# Supplementary material
Source: PubMed Central journal article supplement (PMC11292596)
Supplement: NIHMS2010908-supplement-1.pdf [file NIHMS2010908-supplement-1.pdf]

## APPENDIX

TABLE A1. Health Insurance Navigation Tools Patient Navigation Intervention Content

| Session Content                                                                                                                                                                                                                  |
|----------------------------------------------------------------------------------------------------------------------------------------------------------------------------------------------------------------------------------|
| Session one: learning about survivorship health care needs                                                                                                                                                                       |
| Advise: emphasize importance of understanding health care needs and details of insurance plan (current or future)                                                                                                                |
| Informational: briefly discuss the importance of preventive care for CCS, and how health care needs will influence health insurance choice use and costs                                                                         |
| Assess: discuss participant's survivorship care needs and potential health insurance gaps/barriers                                                                                                                               |
| Assist: problem-solve challenges obtaining information about survivorship care needs. Review basic health insurance terminology                                                                                                  |
| Session two: learning about your plan in relation to policy                                                                                                                                                                      |
| Advise: reinforce importance of survivorship advocacy in terms of trajectory of the ACA, focusing on the responsibility for self-advocating                                                                                      |
| Informational: briefly review ACA, USPSTF prevention guidelines, and COG guidelines for survivors. Provide overview of other health insurance-related policy. Share basic information about types and sources of insurance plans |
| Assess: address any questions regarding policies and guidelines for survivors                                                                                                                                                    |
| Assist: discuss participant's current insurance plan in detail. Begin conversation surrounding barriers to care and challenges navigating current plan                                                                           |
| Session three: overcoming obstacles within your plan                                                                                                                                                                             |
| Advise: prepare participants for shifting health care policies and insurance plans. Emphasize importance of open enrollment                                                                                                      |
| Informational: provide overview of potential hidden costs of health care and potential barriers. Inform participants about resources to help navigate their insurance plan or future plans                                       |
| Assess/assist: provide skills for assertive communication. Problem-solve self-identified obstacles with accessing and using health insurance                                                                                     |
| Session four: managing care costs                                                                                                                                                                                                |
| Advise: reinforce importance of budgeting for medical costs, and always checking if a service will be covered before receiving care                                                                                              |
| Informational: provide overview of cost-estimating tools and the pros and cons of each method                                                                                                                                    |
| Assess: discuss resources participant currently uses to estimate cost of services and to budget for medical costs                                                                                                                |
| Assist: explore strategies for decreasing out-of-pocket costs and cost-planning tips. Provide skills for appealing denials. Review resources that may be helpful in the future                                                   |
| <b>Abbreviation: ACA, Affordable Care Act; CCS, childhood cancer survivors; COG, children's oncology group; USPSTF, US Preventive Services Task Force.</b>                                                                       |

**TABLE A2. Baseline and Follow-Up Health Insurance Literacy Items**

| Self-reported Confidence                                       | Intervention        |                      |          | Control             |                      |          |
|----------------------------------------------------------------|---------------------|----------------------|----------|---------------------|----------------------|----------|
|                                                                | Baseline % (n = 41) | Follow-Up % (n = 37) | % Change | Baseline % (n = 41) | Follow-Up % (n = 40) | % Change |
| Confidence in knowledge of health insurance terms <sup>a</sup> |                     |                      |          |                     |                      |          |
| Coinsurance                                                    | 63.4                | 94.6                 | 31.2     | 65.9                | 72.5                 | 6.6      |
| Copayments                                                     | 85.4                | 97.3                 | 11.9     | 97.6                | 90.0                 | -7.6     |
| Annual out-of-pocket maximum                                   | 87.5                | 100                  | 12.5     | 80.5                | 95.0                 | 14.5     |
| Premium                                                        | 87.8                | 100                  | 12.2     | 87.8                | 97.5                 | 9.7      |
| Covered services                                               | 90.0                | 100                  | 10.0     | 92.7                | 90.0                 | -2.7     |
| Deductible                                                     | 95.1                | 100                  | 4.9      | 92.7                | 100                  | 7.3      |
| Provider network                                               | 95.1                | 100                  | 4.9      | 95.1                | 95.0                 | -0.1     |
| Confidence in knowledge of health insurance activities         |                     |                      |          |                     |                      |          |
| Figure out how to file an appeal if insurer denies a service   | 43.9                | 91.9                 | 48.0     | 46.3                | 64.1                 | 17.8     |
| Calculate cost for out-of-network provider or service          | 58.5                | 81.1                 | 22.6     | 46.3                | 60.0                 | 13.7     |
| Figure out how much a visit/service will cost                  | 68.3                | 94.6                 | 26.3     | 65.9                | 70.0                 | 4.1      |
| Figure out which prescription drugs are covered by plan        | 70.7                | 97.3                 | 26.6     | 73.2                | 76.9                 | 3.7      |
| Figure out what counts as preventive care services             | 75.6                | 97.3                 | 21.7     | 70.7                | 75.0                 | 4.3      |
| Figure out if a service is covered by plan                     | 78.1                | 97.3                 | 19.2     | 85.4                | 77.5                 | -7.9     |
| Figure out copay                                               | 85.4                | 97.3                 | 11.9     | 90.2                | 90.0                 | -0.2     |
| Figure out the cost of plan/premium amount                     | 85.4                | 100                  | 14.6     | 92.7                | 95.0                 | 2.3      |
| Find an in-network provider                                    | 95.1                | 100                  | 4.9      | 92.7                | 97.5                 | 4.8      |

<sup>a</sup>Confidence ratings range = very, somewhat, not too, not at all confident, and very/somewhat confident; higher percentage change indicates greater shift toward very/somewhat confident.

**TABLE A3. Baseline and Follow-Up ACA Provisions Items**

| Self-reported Familiarity                                          | Intervention        |                      |          | Control             |                      |          |
|--------------------------------------------------------------------|---------------------|----------------------|----------|---------------------|----------------------|----------|
|                                                                    | Baseline % (n = 41) | Follow-Up % (n = 37) | % Change | Baseline % (n = 41) | Follow-Up % (n = 40) | % Change |
| Familiarity with key ACA provisions <sup>a</sup>                   |                     |                      |          |                     |                      |          |
| No annual/lifetime limits                                          | 19.5                | 78.4                 | 58.9     | 29.3                | 52.5                 | 23.2     |
| Can file appeal when insurance denies coverage for medical service | 39.0                | 78.4                 | 39.4     | 48.8                | 52.5                 | 3.7      |
| Preventive care is now free                                        | 46.3                | 86.1                 | 39.8     | 52.5                | 57.5                 | 5.0      |
| Subsidies for those with moderate-to low-income purchase coverage  | 63.4                | 75.7                 | 12.3     | 65.0                | 67.5                 | 2.5      |
| Insurers cannot deny coverage because of preexisting conditions    | 70.7                | 97.2                 | 26.5     | 75.6                | 80.0                 | 4.4      |
| Individuals younger than 26 years can stay on parents' insurance   | 85.4                | 94.6                 | 9.2      | 92.7                | 92.5                 | -0.2     |

Abbreviation: ACA, Affordable Care Act.

<sup>a</sup>Familiarity ratings: very, somewhat, not too, not at all familiar, and very/somewhat familiar; higher percentage change indicates greater shift toward very/somewhat familiar.

TABLE A4. Baseline and Follow-Up Financial Burden

| Self-reported Psychological and Behavioral Financial Burden                                                            | Intervention        |                      |          | Control             |                      |          |
|------------------------------------------------------------------------------------------------------------------------|---------------------|----------------------|----------|---------------------|----------------------|----------|
|                                                                                                                        | Baseline % (n = 41) | Follow-Up % (n = 37) | % Change | Baseline % (n = 41) | Follow-Up % (n = 40) | % Change |
| Psychological: How much did you worry that... <sup>a,b</sup>                                                           |                     |                      |          |                     |                      |          |
| You wouldn't be able to pay for medical bills                                                                          | 25.0                | 21.6                 | -3.4     | 20.0                | 20.0                 | 0        |
| You wouldn't be able to get a medical procedure that you needed                                                        | 19.5                | 16.7                 | -2.8     | 12.2                | 15.0                 | 2.8      |
| You wouldn't be able to go to the health care providers you wanted                                                     | 22.0                | 13.5                 | -8.5     | 12.2                | 20.0                 | 7.8      |
| Health insurance would become so expensive you wouldn't be able to afford it                                           | 32.5                | 18.9                 | -13.6    | 19.5                | 20.0                 | 0.5      |
| Your health insurance plan would change terms (eg, costs that were once covered no longer covered)                     | 36.6                | 24.3                 | -12.3    | 17.1                | 25.0                 | 7.9      |
| You would need some health care services that were not covered                                                         | 37.5                | 21.6                 | -15.9    | 17.1                | 20.0                 | 2.9      |
| Behavioral: Was there a time when you did any of the following because you were worried about the cost? <sup>a,c</sup> |                     |                      |          |                     |                      |          |
| Skipped a medical test, treatment, or follow-up that was recommended by a health care provider                         | 19.5                | 10.8                 | -8.7     | 22.0                | 12.5                 | -9.5     |
| Had a medical problem but did not go to a health care provider or a clinic                                             | 19.5                | 18.9                 | -0.6     | 24.4                | 17.5                 | -6.9     |
| Did not see a specialist when you or your health care provider thought you needed one                                  | 9.8                 | 5.4                  | -4.4     | 9.8                 | 12.5                 | 2.7      |
| Put off or postponed preventive care                                                                                   | 39.0                | 21.6                 | -17.4    | 31.7                | 17.5                 | -14.2    |
| Put off or postponed dental care                                                                                       | 26.8                | 18.9                 | -7.9     | 26.8                | 25.0                 | -1.8     |
| Put off or postponed vision care                                                                                       | 22.0                | 18.9                 | -3.1     | 19.5                | 18.0                 | -1.5     |
| Put off or postponed mental health care                                                                                | 24.4                | 19.4                 | -5       | 22.0                | 12.5                 | -9.5     |
| Did not fill a prescription for a medicine                                                                             | 9.8                 | 8.1                  | -1.7     | 12.2                | 7.5                  | -4.7     |
| Took a smaller dose or fewer pills than was prescribed                                                                 | 9.8                 | 8.1                  | -1.7     | 9.8                 | 7.5                  | -2.3     |

Abbreviation: NA, not applicable.

<sup>a</sup>Participants reported for baseline (over the past year) and follow-up (over the past 5 months)

<sup>b</sup>Response options were a great deal, a fair amount, a little, or not at all; grouped as a great deal/fair amount versus a little/not at all. Negative percentage change indicates shift toward little or not at all.

<sup>c</sup>Response options were: yes, no, don't know, and NA; grouped as yes (v no, don't know, and NA). Negative percentage change indicates shift toward no, don't know, or NA.
